# Supplementary material
Source: PubMed Central journal article supplement (PMC4860897)
Supplement: thnov06p0896s1.pdf [file thnov06p0896s1.pdf]

**Supplemental Figure 1. Rhabdomyolysis promotes renal damage.** Tissue sections from mice injected with saline or 10 ml/kg 50% glycerol in each thigh caudal muscle were scored on a semiquantitative scale from 0 to 3 to analyze the loss of brush border, signs of regenerations, desquamation and tubular dilation. Results from each item were added to yield the renal injury score, which had a maximal value of 12. Results are expressed as mean  $\pm$  SE. \*  $p < 0.05$  vs saline-treated mice.

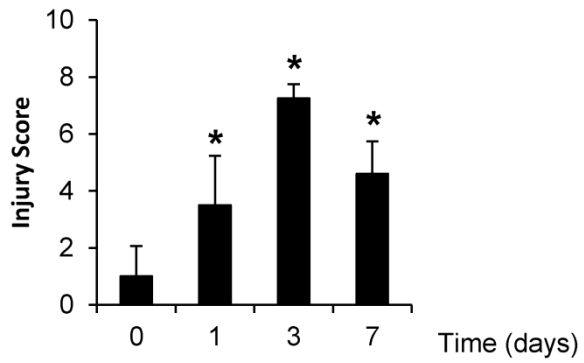

**Supplemental Figure 2. Myoglobin induces HO-1 and IL-10 in mouse peritoneal macrophages.**

Macrophages were isolated from the mouse peritoneal cavity and treated with myoglobin (Mb). (A-B) HO-1 and IL-10 mRNA expression in macrophages treated with Mb (1mg/mL) or equimolar concentration of heme (60 $\mu$ M) for 48h in presence or absence of the HO-1 inducer CoPP or an IL-10 blocking antibody (1 $\mu$ g/mL). (C) IL-10 concentration in supernatants from Mb-stimulated macrophages after 48h of culture. Results are expressed as mean $\pm$ SE of at least three independent experiments. \* p<0.05 as compared with non-treated cells,  $\neq$  p< 0.05 as compared with cells stimulated with Mb.

**A**

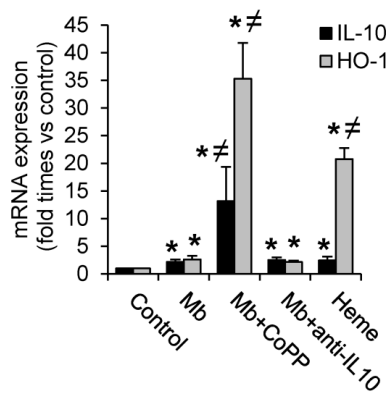

**B**

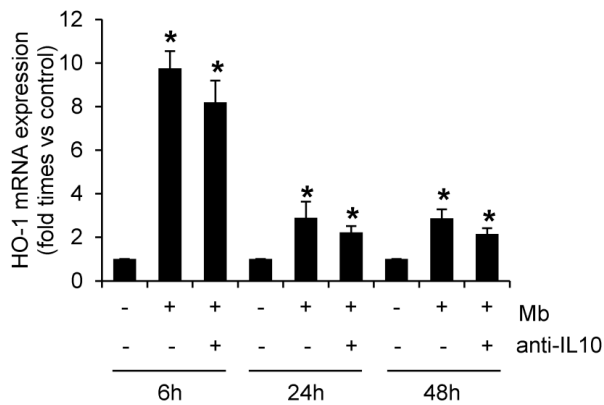

**C**

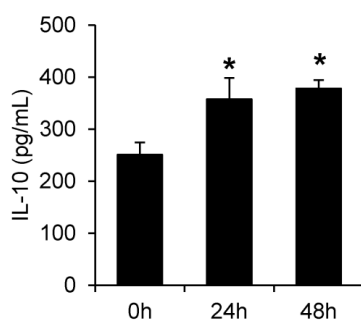

**Supplemental Figure 3.** Histological and fibrosis analysis of kidneys from mice injected with NP-CD163. Representative images showing Hematoxylin-Eosin staining and collagen content by sirius red of renal sections from mice 48h after saline or NP-CD163 injection, scale bar 50  $\mu$ M (A). Semiquantitative assessment of total collagen content (B) and fibronectin (FN) expression, as determined by western-blot (C). Protein expression values were corrected by loading control (Tubulin). Mice (n=4) per group.

**A**

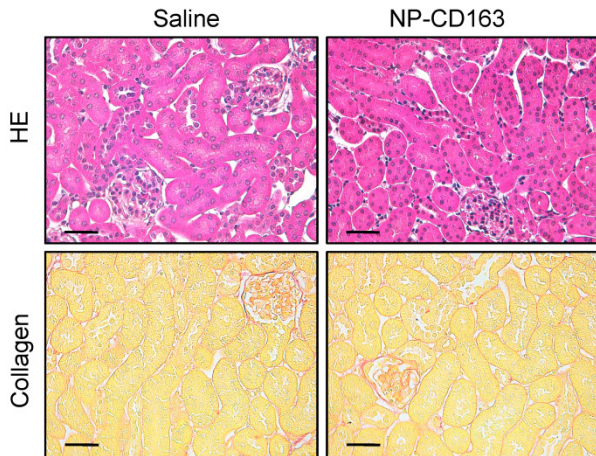

**B**

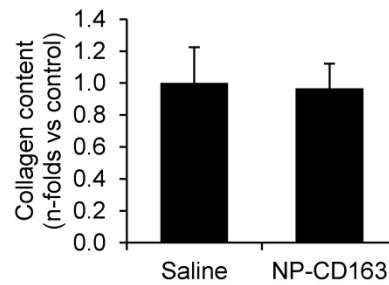

**C**

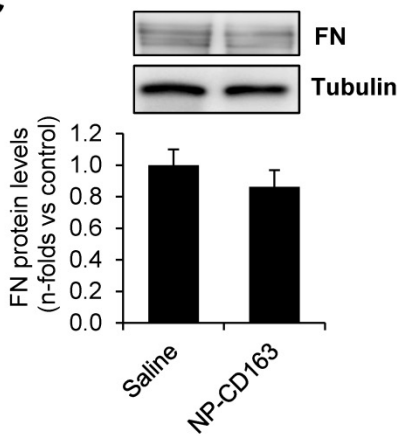

**Supplemental Table 1.** Serum biochemical characteristics of mice 48h post-(NP-CD163)-injection.

|                    | Saline     | NP-CD163   | p value |
|--------------------|------------|------------|---------|
| BUN (mg/dL)        | 32.0±1.5   | 22.3±1.9   | 0.02    |
| Creatinine (mg/dL) | 0.05±0.03  | 0.13±0.74  | 0.37    |
| AST (UI/L)         | 198.8±36.1 | 177.2±37.2 | 0.99    |
| ALT (UI/L)         | 53.2±14.9  | 31.8±8.1   | 0.15    |
| AP (UI/L)          | 72.0±5.2   | 62.5±4.4   | 0.19    |
| Bilirubin (mg/dL)  | 0.1±0.05   | 0.1±0.05   | 0.90    |

Blood urea nitrogen (BUN), aspartate transaminase (AST), alanine transaminase (ALT) and alkaline phosphatase (AP).
